# Supplementary material
Source: MDPI journal article supplement (https://www.mdpi.com/2220-9964/9/9/512)
Supplement: s1 [file s1]

## 1 Supplementary Materials

2 **Flood Frequency Analysis:** In this study Generalized Extreme Value (GEV) probability  
 3 distribution is fitted to annual maximum flood series (Jenkinson, 1955), widely adopted in  
 4 hydrological studies in several regions (El-Jabi et al., 2015; Kochanek et al., 2013; Leclerc and  
 5 Ouarda, 2007; O'Brien and Burn, 2014; Smith et al., 2015). GEV is expressed as thus:

$$6 \quad F(x|\tau, \alpha, \text{ and } k) = \begin{cases} \frac{1}{\alpha} \exp\left\{-\left[1 - \frac{\kappa(x-\tau)}{\alpha}\right]^{\frac{1}{\kappa}}\right\} \left[1 - \frac{\kappa(x-\tau)}{\alpha}\right]^{\frac{1}{\kappa}-1} & \kappa > 0, x < \tau + \frac{\alpha}{\kappa}; \kappa < 0, x > \tau + \frac{\alpha}{\kappa} \\ \frac{1}{\alpha} \exp\left[-\frac{(x-\tau)}{\alpha}\right] \exp\left\{-\exp\left[-\frac{(x-\tau)}{\alpha}\right]\right\} & \text{if } \kappa=0 \end{cases}$$

7

8 Where:  $\tau$ ,  $\alpha$ , and  $k$  represent location, scale and shape parameters respectively of the distribution  
 9 function.

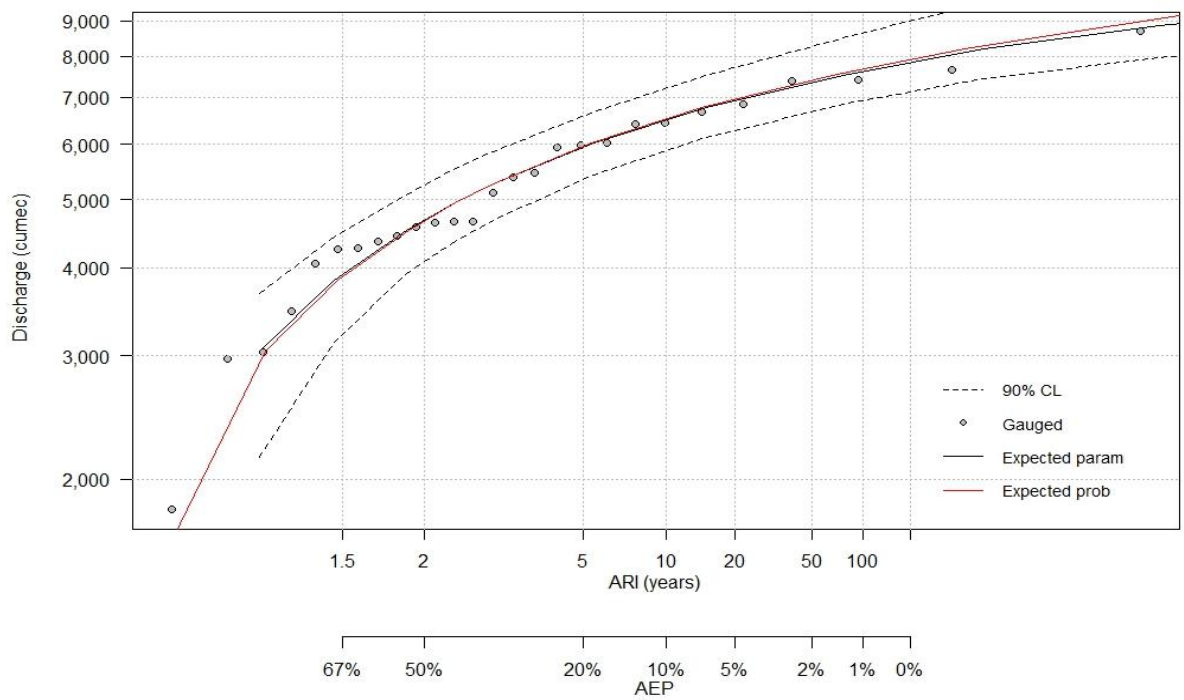

10

11 Figure S1: Baro flood frequency plot

12

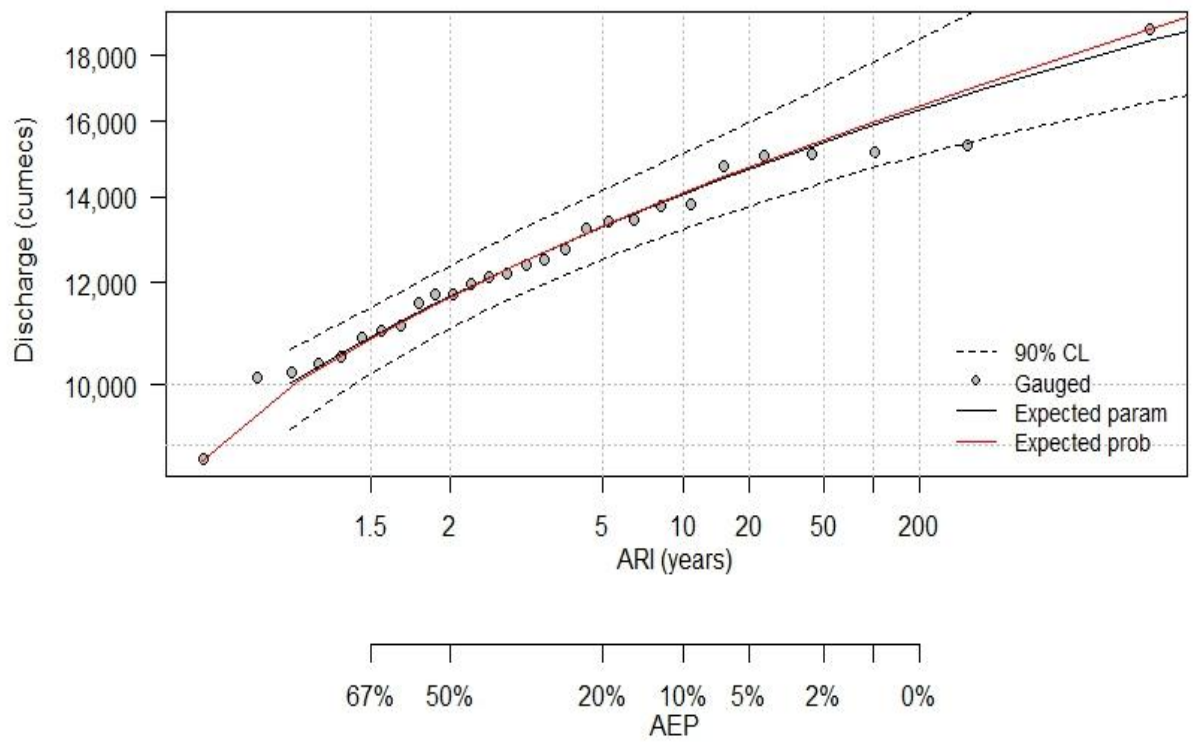

13

14 Figure S2: Umaisha flood frequency plot

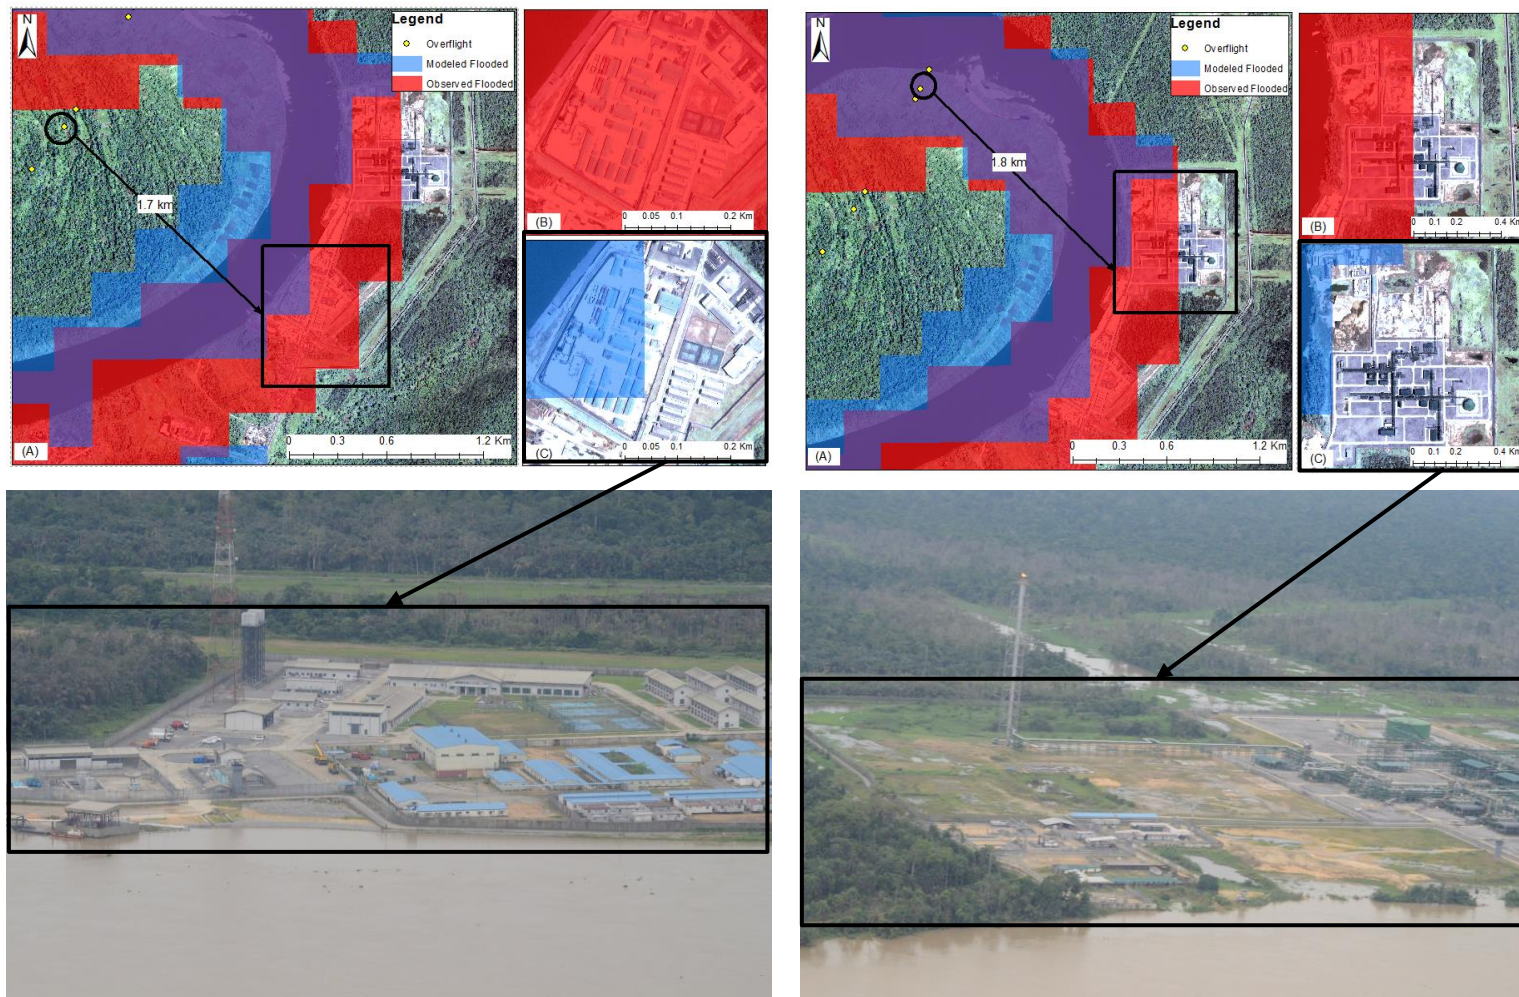

Figure S3: Model, Observation and Overflight line of sight overlaid on high-resolution GeoEye Imagery.

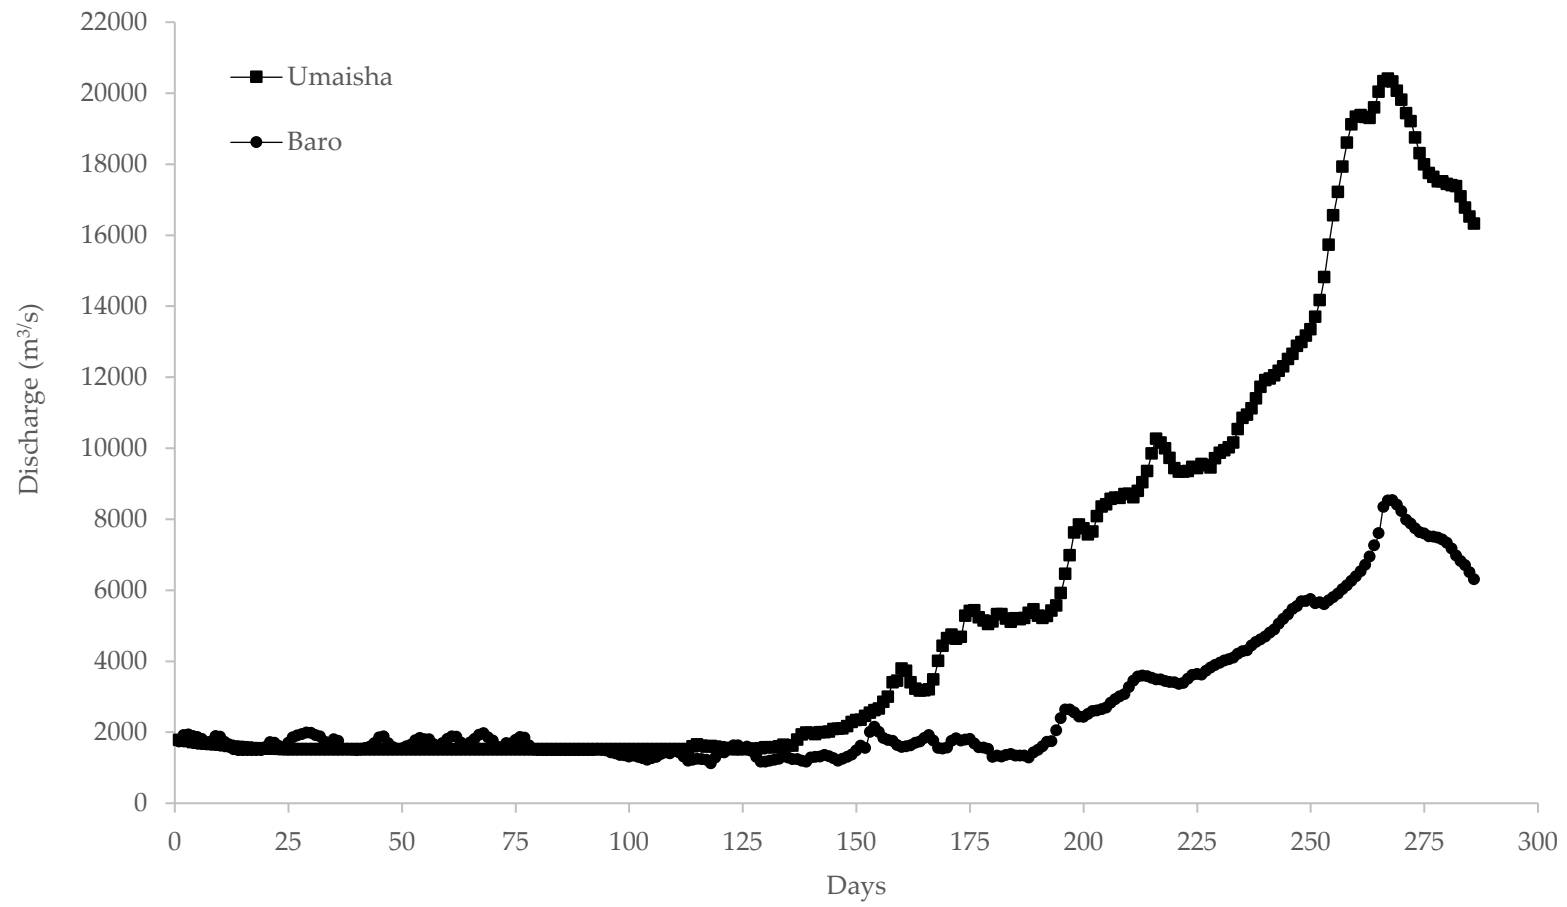

Figure S4: Input hydrographs at the upstream boundaries of Umaisha and Baro
